# Supplementary material for: Production, isolation and structural characterization of [92]fullerene isomers
Source: Royal Society of Chemistry journal article supplement (doi:10.1039/b208820g), 2002-01-01
Supplement: b208820g.doc [file b208820g.doc]

# Supplementary data

The chemical shifts for the 46 lines of [92-*C2*]fullerene are at **: 149.43, 149.38, 148.57, 147.74, 147.62, 147.55, 146.46, 146.41, 146.26, 146.22, 146.00, 145.96, 145.91, 145.80, 145.65, 145.38, 144.83, 144.25, 143.49, 143.11, 142.08, 141.96, 141.63, 141.57, 141.42, 141.34, 141.29, 141.26, 141.24, 140.84, 140.55, 140.19, 139.55, 139.33, 138.58, 138.11, 136.97, 136.25, 135.78, 134.42, 133.92, 133.19, 132.80, 132.58, 132.42 and 131.61. Some weak lines that appear next to the main ones have not taken into consideration as their linewidths do not correspond to sp2 fullerene carbons and therefore they should be most likely side bands due to the inhomogeneity of the field, the very long acquisition time and the nature of the material.

The chemical shifts for the 135 lines of the *inseparable* isolated mixture of [92]fullerene are at **: 152.58, 152.25, 151.19, 150.26, 150.23, 150.21, 148.56, 148.55, 148.43, 148.37, 148.35, 148.21, 147.34, 147.28, 147.23, 147.09, 147.05, 146.89, 146.87, 146.81, 146.78, 146.74, 146.71, 146.63, 146.08, 146.06, 145.65, 145.22, 145.07, 144.96 (2 C), 144.95 (3 C), 144.92, 144.81, 144.77, 144.71, 144.44, 144.38, 144.32, 144.29, 144.20, 144.09, 143.91, 143.75, 143.57, 143.23, 143.21, 143.19, 143.18, 143.17, 143.09, 143.07, 142.90, 142.78, 142.71, 142.46, 142.44, 142.39, 142.33, 142.24, 142.17, 142.15, 142.12, 142.09, 142.06, 141.93, 141.87, 141.86, 141.66, 141.65, 141.42, 141.37, 141.30, 141.16, 141.15, 141.03, 141.01, 140.91, 140.49, 140.42, 140.38, 140.20, 140.14, 140.12, 139.84, 139.81, 139.79, 139.78, 139.75, 139.66, 139.59, 139.40, 139.29, 139.28, 139.21, 139.07, 138.99, 138.92, 138.90, 138.77, 138.07, 137.79, 137.68, 137.06, 136.91, 136.65, 136.60, 136.37, 136.16, 136.12, 135.53, 135.40, 135.31, 135.22, 134.74, 134.67, 134.61, 134.59, 134.56, 134.47, 134.38, 134.23, 134.02, 133.80, 133.75, 133.61, 133.39, 133.23, 133.21, 132.98, 132.71, 132.43, 132.22, 132.05, 132.01 and 131.77.
