# Supplementary figures and images for: Production, isolation and structural characterization of [92]fullerene isomers
Source: Royal Society of Chemistry journal article supplement (doi:10.1039/b208820g), 2002-01-01

Absorbance / arb. units

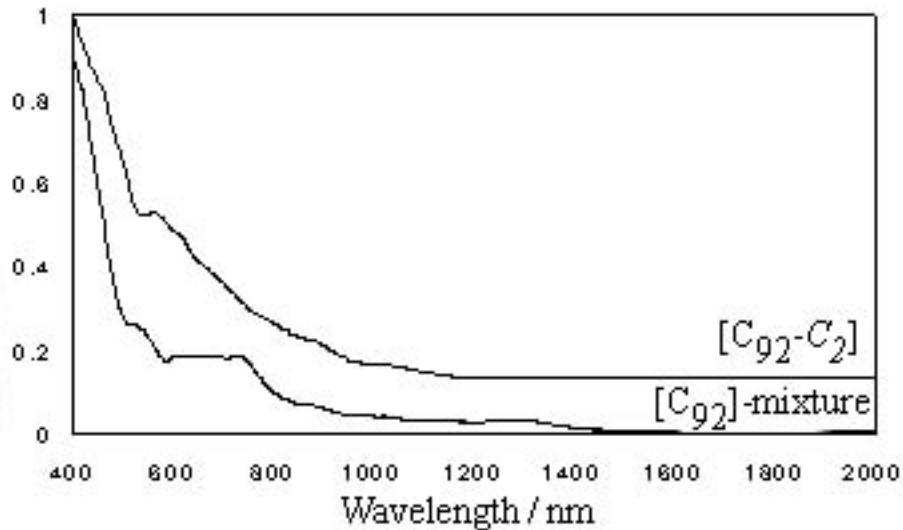

$[C_{92}-C_2]$

$[C_{92}]$ -mixture

Supplement: b208820g.pdf [file b208820g.pdf]
